# Supplementary material
Source: PubMed Central journal article supplement (PMC7280071)
Supplement: NIHMS1550558-supplement-1.pdf [file NIHMS1550558-supplement-1.pdf]

## Supplement 1

### LCA Measures (including psychometric information)

History of Mental Health Service Utilization. We asked adolescents and parents questions to assess: (1) youth's history of psychiatric hospitalization; (2) medication treatment for mental health concern; (3) outpatient psychotherapy/counseling/psychosocial intervention. Response options were Yes/No for lifetime and past month utilization. These items were adapted from the Healthy Minds Study<sup>1</sup> and the National Epidemiologic Survey on Alcohol and Related Conditions,<sup>2</sup> which has documented strong reliability and validity.<sup>3</sup> The primary reason for the ED visit was coded as psychiatric or non-psychiatric.

Suicidal Ideation, History of Multiple Suicide Attempts. We asked adolescents to complete the Suicide Severity Scale of the Columbia-Suicide Severity Rating Scale (C-SSRS),<sup>4</sup> which includes five items related to suicidal thoughts and yields scores ranging from 0 to 5, and has documented strong convergent validity and internal consistency.<sup>5</sup> Adolescents completed an adapted version of the C-SSRS Behavior scale, which includes yes/no questions about a range of suicidal behaviors. We asked the suicide attempt question in two ways (with and without the exact phrase "suicide attempt," but with the same definition and probes) and coded a positive response to either as a suicide attempt.

Depression, Alcohol Use, Drug Use. We used the PHQ-9, a nine-item scale that asks the respondent to indicate the frequency of depressive symptoms over the past two weeks.<sup>6</sup> The PHQ-9 has shown strong internal consistency for adolescents males and females,<sup>7</sup> in addition to excellent construct validity<sup>7,8</sup> and criterion validity in samples of adolescents.<sup>8,9</sup> We used the Alcohol Use Disorders Identification Test- Consumption (AUDIT-C), which assesses at-risk drinking and alcohol consumption in the past year.<sup>6</sup> The AUDIT has been validated for use with adolescents in

the ED.<sup>10</sup> It has demonstrated strong internal consistency ( $\alpha = .80$ ) and satisfactory validity for the identification of adolescents with alcohol use disorders.<sup>11</sup> We also used categories and response choices from the NIDA-Modified ASSIST version<sup>12</sup> of the Drug Use Scale to assess frequency of use during the past 3 months (never, once or twice, monthly, weekly, daily or almost daily) for multiple drug categories, including cannabis. In the LCA, we included a dichotomous variable to indicate whether or not the youth scored 3 or higher on the AUDIT-C and whether or not the youth had used cannabis at least monthly during the past 3 months.

Aggression. We used a 1-item screen from the Impulsive Premeditated Aggression Scale (IPAS):<sup>13</sup> “Over the past three months, have you had times when you became angry and enraged with others in a way that was out-of-control or inappropriate?” Follow-up questions assess the number of times and the behaviors (verbally attacked someone, thrown or destroyed objects, physically attacked someone). The score is the number of these items endorsed.

Childhood Sexual and Physical Abuse. Abuse was assessed with a brief two-item screener derived from the Childhood Trauma Questionnaire (CTQ-SF).<sup>14,15</sup> The screener has a Yes/No response format: “People in my family have hit me so hard that it left me with bruises or marks.” and “Someone has tried to touch me in a sexual way or tried to make me touch them.”<sup>15</sup> This screener has been used previously with adolescents<sup>16</sup> and has excellent sensitivity and specificity for identifying childhood abuse (determined by responses to a semi-structured interview focused on child abuse history) in a sample of women.<sup>15</sup> Scores on this screener have been associated with NSSI in adolescents.<sup>16</sup>

**Additional Measures of Suicide Risk Factors (Examined in LCA, not included in final model)**

The variables described below were considered for addition to the LCA model; however, classes remained unchanged when they were added. In order to maintain a more parsimonious model, they were not included in the final LCA model.

Hopelessness. This was assessed with one item from the Mood and Feelings Questionnaire, which assesses hopelessness during the past two weeks and is scored on a 3-point scale.<sup>17</sup> The item is as follows: “I thought there was nothing good for me in the future.” This variable was used as a three-level ordinal categorical variable for analysis.

Anxiety, Agitation, Impulsivity. Anxiety was measured with the 5-item Screen for Child Anxiety Related Emotional Disorders (SCARED), which has shown psychometric properties to those of the longer version of SCARED.<sup>18</sup> Agitation over the past week was assessed with the Brief Agitation Measure (BAM),<sup>19</sup> which is a three item self-report instrument with a 7-point Likert scale. Sample items are: “I feel so stirred up inside I want to scream”, and “I feel a lot of emotional turmoil in my gut”. The BAM has demonstrated very good to excellent internal consistency, convergent validity, and discriminate validity.<sup>19</sup> Impulsivity was assessed with the 4-item Urgency subscale of the UPPS Impulsivity Behavior Scale,<sup>20</sup> which assesses the propensity to experience strong impulses, often associated with negative affect. Sample items include “It is hard for me to not act on my feelings” and “Sometimes I do impulsive things that I wish I hadn’t.” This subscale has demonstrated high internal consistency ( $\alpha = .91$ ) and incremental validity for predicting suicide attempts and NSSI.<sup>21</sup>

Non-Suicidal Self-Injury (NSSI). We assessed NSSI with the Youth Risk Behavior Survey NSSI question: “During the past 12 months, how many times did you do something to purposely hurt yourself without wanting to die, such as cutting or burning yourself on purpose?”<sup>22</sup> NSSI was coded as present (any non-zero response) or absent for the LCA analysis.

Social/Interpersonal Risk Factors. We used the two peer victimization items from the 4-item Peer Victimization and Perpetration Questionnaire to assess peer victimization in and away from school. Responses are scored on a 5-point Likert scale, ranging from “I haven’t been bullied in school this term” to “several times a week.” Youth reports of victimization on these items have been associated with suicide risk factors, including suicidal ideation and suicide attempts.<sup>23-25</sup> To assess friend connectedness, we used the sum of scores on two items from the 6-item measure of adolescent connectedness.<sup>26</sup> These items are as follows: “I have friends I’m really close to and trust completely.” “Spending time with my friends is a big part of my life.” We assessed parent and family connectedness with two items from the 13-item Parent-Family Connectedness scale.<sup>27</sup> These items were: “How much do people in your family understand you?”, “How much does your family pay attention to you?” For school connectedness, we used two items from the 6-item School Connectedness Scale.<sup>27</sup> These items were: “You feel close to people at your school”, “You feel like you are part of your school.”

Adaptive Functioning. We used an adapted version of the PHQ-9 item: “How difficult have these problems made it for you to do your work, take care of things at home, or get along with other people?”<sup>6</sup> This item has shown excellent concurrent validity in studies with adult patients<sup>6</sup> and college students.<sup>28,29</sup> Because we were interested in functional impairment broadly, rather than only in association with depressive symptoms, we modified this to: “Over the last two weeks, how hard has it been for you to do what you need to do and get along with others?”

**Table S1.** Fit Statistics for Models with Three, Four, and Five Classes

| # Classes | Parameters | Smallest Class | BIC   | AIC   | Entropy |
|-----------|------------|----------------|-------|-------|---------|
| 3         | 29         | 19.5%          | 27183 | 27027 | 0.99    |
| 4         | 38         | 10.4%          | 27024 | 26820 | 0.95    |
| 5         | 47         | 8.9%           | 26666 | 26413 | 0.97    |

Journal Pre-proof

**Table S2.** Demographics in Relation to Five Latent Classes

|                                                | Latent Class Assignment <sup>a</sup> |                          |                        |                                  |                           | P-value              |
|------------------------------------------------|--------------------------------------|--------------------------|------------------------|----------------------------------|---------------------------|----------------------|
|                                                | S-STB+AGG (9%)<br>(N = 142)          | S-STB (21%)<br>(N = 342) | STB (15%)<br>(N = 239) | HX-STB+AGG<br>(10%)<br>(N = 164) | HX-STB (45%)<br>(N = 722) |                      |
| <b>Age at enrollment (years):</b><br>Mean (SD) | 14.9 (1.54)                          | 15.1 (1.48)              | 15.1 (1.47)            | 15.3 (1.53)                      | 15.3 (1.61)               | 0.074 <sup>b</sup>   |
| <b>Gender</b>                                  |                                      |                          |                        |                                  |                           | 0.436 <sup>c</sup>   |
| Male                                           | 32/395 (8%)                          | 78/395 (20%)             | 66/395 (17%)           | 47/395 (12%)                     | 172/395 (44%)             |                      |
| Female                                         | 110/1214 (9%)                        | 264/1214<br>(22%)        | 173/1214<br>(14%)      | 117/1214 (10%)                   | 550/1214 (45%)            |                      |
| <b>Race</b>                                    |                                      |                          |                        |                                  |                           | <.001 <sup>c</sup>   |
| White                                          | 84/882 (10%)                         | 219/882 (25%)            | 134/882 (15%)          | 72/882 (8%)                      | 373/882 (42%)             |                      |
| Black or African American                      | 29/356 (8%)                          | 46/356 (13%)             | 51/356 (14%)           | 55/356 (15%)                     | 175/356 (49%)             |                      |
| Other/Unknown                                  | 17/246 (7%)                          | 55/246 (22%)             | 34/246 (14%)           | 22/246 (9%)                      | 118/246 (48%)             |                      |
| <b>Ethnicity</b>                               |                                      |                          |                        |                                  |                           | 0.073 <sup>c,d</sup> |
| Hispanic or Latino                             | 20/340 (6%)                          | 69/340 (20%)             | 46/340 (14%)           | 28/340 (8%)                      | 177/340 (52%)             |                      |
| Not Hispanic or Latino                         | 97/1061 (9%)                         | 229/1061<br>(22%)        | 161/1061<br>(15%)      | 114/1061 (11%)                   | 460/1061 (43%)            |                      |
| Unknown                                        | 14/99 (14%)                          | 21/99 (21%)              | 15/99 (15%)            | 7/99 (7%)                        | 42/99 (42%)               |                      |
| <b>Education -<br/>mother/stepmother</b>       |                                      |                          |                        |                                  |                           | 0.211 <sup>c</sup>   |
| High school graduate or less                   | 40/488 (8%)                          | 93/488 (19%)             | 70/488 (14%)           | 49/488 (10%)                     | 236/488 (48%)             |                      |
| Some college/technical                         | 43/437 (10%)                         | 82/437 (19%)             | 70/437 (16%)           | 51/437 (12%)                     | 191/437 (44%)             |                      |
| College graduate/professional                  | 48/571 (8%)                          | 144/571 (25%)            | 85/571 (15%)           | 51/571 (9%)                      | 243/571 (43%)             |                      |

## ADOLESCENT SUICIDE RISK PROFILES

|                                          |              |               |               |              |               |                    |
|------------------------------------------|--------------|---------------|---------------|--------------|---------------|--------------------|
| Don't know/Not applicable                | 5/39 (13%)   | 8/39 (21%)    | 3/39 (8%)     | 2/39 (5%)    | 21/39 (54%)   |                    |
| <b>Education - father/stepfather</b>     |              |               |               |              |               | 0.011 <sup>c</sup> |
| High school graduate or less             | 58/647 (9%)  | 113/647 (17%) | 102/647 (16%) | 66/647 (10%) | 308/647 (48%) |                    |
| Some college/technical                   | 33/292 (11%) | 59/292 (20%)  | 41/292 (14%)  | 33/292 (11%) | 126/292 (43%) |                    |
| College graduate/professional            | 33/417 (8%)  | 120/417 (29%) | 60/417 (14%)  | 36/417 (9%)  | 168/417 (40%) |                    |
| Don't know/Not applicable                | 11/172 (6%)  | 35/172 (20%)  | 22/172 (13%)  | 17/172 (10%) | 87/172 (51%)  |                    |
| <b>Family receives public assistance</b> |              |               |               |              |               | 0.079 <sup>c</sup> |
| No                                       | 74/826 (9%)  | 198/826 (24%) | 125/826 (15%) | 74/826 (9%)  | 355/826 (43%) |                    |
| Yes                                      | 62/697 (9%)  | 129/697 (19%) | 100/697 (14%) | 75/697 (11%) | 331/697 (47%) |                    |

---

Note: S-STB+AGG= Severe Suicidal Thoughts/Behavior + Aggression; S-STB= Severe Suicidal Thoughts/Behavior; STB= Suicidal Thoughts/Behavior; HX-STB+AGG= History of Suicidal Thoughts/Behavior + Aggression; HX-STB= History of Suicidal Thoughts/Behavior.  
<sup>a</sup> n's for calculation of percentages vary from 130-142 for S-STB+AGG, 319-342 for S-STB, 219-239 for STB, 149-164 for HX-STB+AGG, 666 to 722 for HX-STB.

<sup>b</sup> Kruskal-Wallis test

<sup>c</sup> Chi-squared test

<sup>d</sup> P-value = .043 if "Unknown" category is not included in analysis.

## ADOLESCENT SUICIDE RISK PROFILES

**Table S3.** Past Month Mental Health Service Utilization in Relation to Demographics and Latent Classes (Adjusted Odds Ratios)

|                        | Psychiatric Hospitalization |         | Psychiatric Medication |         | Outpatient Therapy |         |
|------------------------|-----------------------------|---------|------------------------|---------|--------------------|---------|
|                        | OR (95% CI)                 | P-value | OR (95% CI)            | P-value | OR (95% CI)        | P-value |
| <b>Age in years</b>    | 0.93 (0.79, 1.09)           | 0.34    | 1.00 (0.93, 1.09)      | 0.93    | 1.01 (0.94, 1.09)  | 0.75    |
| <b>Sex</b>             |                             | 0.03    |                        | 0.50    |                    | 0.37    |
| Male                   | (reference)                 |         | (reference)            |         | (reference)        |         |
| Female                 | 2.08 (1.09, 3.97)           |         | 1.10 (0.84, 1.45)      |         | 1.13 (0.87, 1.47)  |         |
| <b>Race</b>            |                             | 0.18    |                        | <.001   |                    | <.001   |
| White                  | (reference)                 |         | (reference)            |         | (reference)        |         |
| Black                  | 1.22 (0.66, 2.26)           |         | 0.30 (0.22, 0.42)      |         | 0.46 (0.34, 0.62)  |         |
| Other/Unknown          | 1.85 (0.96, 3.55)           |         | 0.71 (0.49, 1.01)      |         | 1.00 (0.70, 1.42)  |         |
| <b>Ethnicity</b>       |                             | 0.19    |                        | <.001   |                    | 0.01    |
| Not Hispanic or Latino | (reference)                 |         | (reference)            |         | (reference)        |         |
| Hispanic or Latino     | 0.53 (0.24, 1.17)           |         | 0.48 (0.34, 0.68)      |         | 0.60 (0.43, 0.84)  |         |
| Unknown                | 0.57 (0.19, 1.72)           |         | 0.73 (0.42, 1.27)      |         | 0.81 (0.48, 1.37)  |         |
| <b>Latent Classes</b>  |                             | <.001   |                        | <.001   |                    | <.001   |
| HX-STB                 | (reference)                 |         | (reference)            |         | (reference)        |         |
| HX-STB+AGG             | 4.41 (1.51, 12.87)          |         | 1.82 (1.20, 2.77)      |         | 1.87 (1.25, 2.79)  |         |
| STB                    | 3.10 (1.07, 9.00)           |         | 1.68 (1.17, 2.41)      |         | 1.75 (1.24, 2.48)  |         |
| S-STB                  | 13.00 (5.67, 29.79)         |         | 2.72 (1.99, 3.70)      |         | 2.71 (2.00, 3.69)  |         |

## ADOLESCENT SUICIDE RISK PROFILES

S-STB+AGG

18.61 (7.63, 45.38)

3.69 (2.39, 5.70)

3.41 (2.22, 5.23)

---

Note: S-STB+A= Severe Suicidal Thoughts/Behavior with Aggression; S-STB= Severe Suicidal Thoughts/Behavior; M-STB= Mild Suicidal Thoughts/Behavior; A= Aggression; HX-Low= History Suicidal Thoughts/Behavior with Current Low Levels of Risk Indicators.

Journal Pre-proof

**References**

1. Eisenberg D, Golberstein E, Gollust SE. Help-seeking and access to mental health care in a university student population. *Med Care*. 2007;45(7):594-601.
2. Grant BF, Stinson FS, Dawson DA, et al. Prevalence and co-occurrence of substance use disorders and independent mood and anxiety disorders: Results from the National Epidemiologic Survey on Alcohol and Related Conditions. *Arch Gen Psychiatry*. 2004;61(8):807-816.
3. Chatterji S, Saunders JB, Vraști R, Grant BF, Hasin D, Mager D. Reliability of the alcohol and drug modules of the Alcohol Use Disorder and Associated Disabilities Interview Schedule-Alcohol/Drug-Revised (AUDADIS-ADR): An international comparison. *Drug Alcohol Depend*. 1997;47(3):171-185.
4. Posner K, Brent D, Lucas C, et al. Columbia-Suicide Severity Rating Scale (C-SSRS). 2007; [http://www.fda.gov/ohrms/dockets/ac/07/slides/2007-4306s1-01-CU-Posner\\_files/frame.htm#slide0708.htm](http://www.fda.gov/ohrms/dockets/ac/07/slides/2007-4306s1-01-CU-Posner_files/frame.htm#slide0708.htm). Accessed January 27, 2009.
5. Posner K, Brown GK, Stanley B, et al. The Columbia–Suicide Severity Rating Scale: Initial validity and internal consistency findings from three multisite studies with adolescents and adults. *Am J Psychiatry*. 2011;168(12):1266-1277.
6. Kroenke K, Spitzer RL, Williams JBW. The PHQ-9: Validity of a brief depression severity measure. *J Gen Intern Med*. 2001;16(9):606-613.
7. Burdzovic Andreas J, Brunborg GS. Depressive symptomatology among Norwegian adolescent boys and girls: The Patient Health Questionnaire-9 (PHQ-9) psychometric properties and correlates. *Frontiers in Psychology*. 2017;8(887):1-11.

8. Richardson LP, McCauley E, Grossman DC, et al. Evaluation of the Patient Health Questionnaire-9 Item for detecting major depression among adolescents. *Pediatrics*. 2010;126(6):1117-1123.
9. Allgaier AK, Pietsch K, Fruhe B, Sigl-Glockner J, Schulte-Korne G. Screening for depression in adolescents: Validity of the Patient Health Questionnaire in pediatric care. *Depress Anxiety*. 2012;29(10):906-913.
10. Chung T, Colby SM, Barnett NP, Monti PM. Alcohol Use Disorders Identification Test: Factor structure in an adolescent emergency department sample. *Alcoholism: Clinical and Experimental Research*. 2002;26(2):223-231.
11. Rumpf HJ, Wohlert T, Freyer-Adam J, Grothues J, Bischof G. Screening questionnaires for problem drinking in adolescents: Performance of AUDIT, AUDIT-C, CRAFFT and POSIT. *Eur Addict Res*. 2013;19(3):121-127.
12. National Institute for Drug Abuse. NIDA-Modified Assist. 2013; <https://www.drugabuse.gov/sites/default/files/pdf/nmassist.pdf>. Accessed October 11, 2015.
13. Stanford MS, Greve KW, Dickens TJ. Irritability and impulsiveness: Relationship to self-reported impulsive aggression. *Personality and Individual Differences*. 1995;19(5):757-760.
14. Bernstein DP, Stein JA, Newcomb MD, et al. Development and validation of a brief screening version of the Childhood Trauma Questionnaire. *Child Abuse Negl*. 2003;27(2):169-190.
15. Thombs BD, Bernstein DP, Ziegelstein RC, Bennett W, Walker EA. A brief two-item screener for detecting a history of physical or sexual abuse in childhood. *Gen Hosp Psychiatry*. 2007;29(1):8-13.

16. Garisch JA, Wilson MS. Prevalence, correlates, and prospective predictors of non-suicidal self-injury among New Zealand adolescents: cross-sectional and longitudinal survey data. *Child Adolesc Psychiatry Ment Health*. 2015;9(1):28-39.
17. Angold A, Costello E. Mood and feelings questionnaire (MFQ). *Developmental Epidemiology Program*. Durham, NJ1987.
18. Birmaher B, Brent DA, Chiappetta L, Bridge J, Monga S, Baugher M. Psychometric properties of the Screen for Child Anxiety Related Emotional Disorders (SCARED): A replication study. *J Am Acad Child Adolesc Psychiatry*. 1999;38(10):1230-1236.
19. Ribeiro JD, Bender TW, Selby EA, Hames JL, Joiner TE. Development and validation of a brief self-report measure of agitation: The Brief Agitation Measure. *J Pers Assess*. 2011;93(6):597-604.
20. Whiteside SP, Lynam DR. The Five Factor Model and impulsivity: Using a structural model of personality to understand impulsivity. *Personality and Individual Differences*. 2001;30(4):669-689.
21. Lynam DR, Miller JD, Miller DJ, Bornovalova MA, Lejuez CW. Testing the relations between impulsivity-related traits, suicidality, and nonsuicidal self-injury: A test of the incremental validity of the UPPS model. *Personality disorders*. 2011;2(2):151-160.
22. Lloyd-Richardson EE, Perrine N, Dierker L, Kelley ML. Characteristics and functions of non-suicidal self-injury in a community sample of adolescents. *Psychol Med*. 2007;37(8):1183-1192.
23. Klomek AB, Marrocco F, Kleinman M, Schonfeld IS, Gould MS. Peer victimization, depression, and suicidality in adolescents. *Suicide Life Threat Behav*. 2008;38(2):166-180.

24. Klomek AB, Kleinman M, Altschuler E, Marrocco F, Amakawa L, Gould MS. High school bullying as a risk for later depression and suicidality. *Suicide Life Threat Behav.* 2011;41(5):501-516.
25. Klomek AB, Marrocco F, Kleinman M, Schonfeld IS, Gould M. Bullying, depression, and suicidality in adolescents. *J Am Acad Child Adolesc Psychiatry.* 2007;46:40-49.
26. Karcher MJ. The Hemingway: Measure of Adolescent Connectedness: Validation studies. 2001; <http://adolescentconnectedness.com>.
27. Resnick MD, Bearman PS, Blum RW, et al. Protecting adolescents from harm: Findings from the National Longitudinal Study on Adolescent Health. *Journal of the American Medical Association.* 1997;278(10):823-832.
28. Eisenberg D, Hunt J, Speer N. Mental health in American colleges and universities: Variation across student subgroups and across campuses. *J Nerv Ment Dis.* 2013;201(1):60-67.
29. Garlow SJ, Rosenberg J, Moore JD, et al. Depression, desperation, and suicidal ideation in college students: Results from the American Foundation for Suicide Prevention College Screening Project at Emory University. *Depress Anxiety.* 2008;25(6):482-488.
